# Supplementary material for: Specific Functional Features of the Cell Integrity MAP Kinase Pathway in the Dimorphic Fission Yeast Schizosaccharomyces japonicus
Source: MDPI journal article supplement (doi:10.3390/jof7060482), 2021-06-14
Supplement: s1 [file s1]

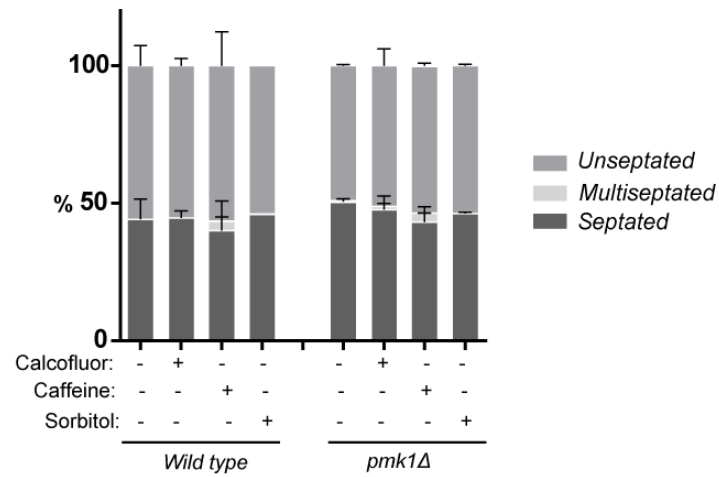

**Figure S1. Septation phenotypes of *S. japonicus pmk1Δ* cells.** Exponentially growing *S. japonicus* wild type and *pmk1Δ* strains were incubated for 10 h in YES medium plus 5  $\mu$ g/ml calcofluor white, 5 mM Caffeine or 1M sorbitol, and the percentage of unseptated, septated and multiseptated cells (represented as mean  $\pm$  SD from biological triplicates; number of total cells  $\geq 200$ ) was determined by fluorescence microscopy after calcofluor white staining.

Pmk1

Gly-rich

*S. japonicus* MDRRHRVYRVFHQEMFVEPNFKVKVELGQGAYGITVCAARNMASKEQEGVAIKKITNIFSK  
*S. pombe* MDRRHRVYRVFNQEMYVEPNFKVKVELGQGAYGITVCAARNVASKDQEAVALKKITNVFSK  
\*\*\*\*\*.\*:\*:\*\*\*\*\*.\*:\*:\*:\*:\*:\*:\*:\*:\*:\*:

IV V (Hinge)

*S. japonicus* PILTKRALRLIKLLIHLNRHR-----NMEADLNAIKSGQP  
*S. pombe* SILTKRALRLIKLLIHFRNHRNITCIYDLDIINPYNFNEVYIYEELMADLNAIKSGQP  
.\*\*\*\*\*.\*:\*:\*\*\*\*\*.

*S. japonicus* LTAHFQSFYIQILCGLKYIHSANVIHRDLKPGNLLVNADCELKICDFGLARGFSDNPDE  
*S. pombe* LTAHFQSFYIQILCGLKYIHSANVIHRDLKPGNLLVNADCELKICDFGLARGCSENPEE  
\*\*\*\*\*.\*:\*:\*:

Act. Loop

*S. japonicus* NAGFMTEYVATRWYRAPEIMLSFSSYHKGDIDVWSVGCILAELLGGRPFFKGKDYVHQNLN  
*S. pombe* NPGFMTEYVATRWYRAPEIMLSFSSYHKGDIDVWSVGCILAELLGGTPLFKGKDFVHQNLN  
\*.\*\*\*\*\*.\*:\*:\*:\*:\*:\*:\*:\*:\*:\*:

*S. japonicus* ILHYLGTPDEETLRSISRERAYNYIRSFPPKKPIPFETIPFYANPLALDLLSRMLTFDPA  
*S. pombe* ILHQLGTPDEETLSHISSRAQEYVRSLPKQRPIPFETNFPPKANPLALDLLAKLAFDPN  
\*\*\* \*\*\*\*\*.\*:\*:\*:\*:\*:\*:\*:\*:\*:\*:\*:\*:\*:\*:\*:\*:\*:\*:\*:\*:\*:\*:\*:\*:\*:\*:\*:

CD domain

*S. japonicus* KRISVTEALEHPYLAVWHDPADEPECPIPFDFSFEAINDMNELRDLIQREVLAFRRNVRR  
*S. pombe* RRISSVDDALEHPYLAVWHDPSDEPVCDVSFDDFSFEYIEDANELRRVILDEVLFNRQKVR  
:\*:\*:\*:\*:\*:\*:\*:\*:\*:\*:\*:\*:\*:\*:\*:\*:\*:\*:\*:\*:\*:\*:\*:\*:\*:\*:\*:\*:\*:\*:\*:\*:

*S. japonicus* SPNPSPHLPHIQINSQLSRASAMHSQHSGHVS NHLRSSMPTSNQTQNESNDLSPRPHSP  
*S. pombe* RSHPTNPTVN-----IPQPAQTVPNSDNGS FNVSSSSSQTSNKKRHDSYNETAAID  
.:\*: \*: : ..\*.:\*:..\*.. \*\* \*\*\*.:...: . .

*S. japonicus* RLIDANDLEAELSKY  
*S. pombe* HKSDDNRNH-----  
.:...: . .

B

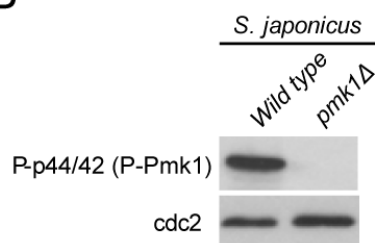

**Figure S2. Conserved structural features of Pmk1 MAPKs in *S. pombe* and *S. japonicus*.** (A) ClustalW analysis (<https://www.genome.jp/tools-bin/clustalw>) of amino-acids sequences of Pmk1 MAPKs in *S. pombe* and *S. japonicus*. '\*': identical amino acid; ':': conserved substitution, '·': semi-conserved substitution. Conserved residues/motifs involved in ATP binding are shaded in yellow. The gate-keeper residue is shaded in blue. Putative common docking (CD) sites are shaded in purple. The phosphorylatable amino acids at the conserved -TEY- activation loop are shaded in green. (B) *S. japonicus* wild type and *pmk1Δ* strains were grown in YES medium to mid-log phase, and activated Pmk1 was detected with anti-phospho-p44/42 antibody, whereas anti-Cdc2 was used as a loading control.

```

Chaetothyriales DV737_g786      MSDLSGRKVFVKVFNQDFIVDERYTVTKELGQGAYGIVCAATNTNTG--EG
Chaetothyriales DV736_g4926    MSDLSGRKVFVKVFNQDFIVDDRYTVTKELGQGAYGIVCAATNTQTG--EG
O. camponoti CP532_1836        MAGLQGRKVFVKVFNQDFIVDERYTVTKELGQGAYGIVCAAVNNQTT--EG
S. japonicus Pmk1              --MDRRHRVYRVFVHQEMFVEPNFKVVKELGQGAYGIVCAAKNMAKQEG
S. pombe Pmk1                  --MDRRHRVYRVFVHQEMYVEPNFKVVKELGQGAYGIVCAARNVASKDQEA
                                :*:::*:::*: :. :.*.***** * : *.
                                IV
Chaetothyriales DV737_g786      VAIKKVTNVFSKKILAKRALREIKLLQHFRGHRN-----
Chaetothyriales DV736_g4926    VAIKKVTNVFSKKILAKRALREIKLLQHFRGHR-----
O. camponoti CP532_1836        VAIKKVTNIFSKKILAKRALREIKLMQHFRGHR-----
S. japonicus Pmk1              VAIKKITNIFSKPILTKRALREIKLLIHLRNHR-----
S. pombe Pmk1                  VAIKKITNVFSKSIITKRALREIKLLIHFRNHRNITCIYDLDIINPYNFN
                                *****:***:*** **:*****: *:*.**
                                V (Hinge)
Chaetothyriales DV737_g786      -----ELMECDLAAIIRSGQPLTDAHFQSFIYQILCGLKYIHSANVLHR
Chaetothyriales DV736_g4926    -----NLMECDLAAIIRSGQPLTDAHFQSFIYQILCGLKYIHSANVLHR
O. camponoti CP532_1836        -----NLMECDLAAIIRSGQALTDHFQSFIYQILCGLKYIHSANVLHR
S. japonicus Pmk1              -----NMEADLNAAIKSGQPLTDAHFQSFIYQILCGLKYIHSANVIHR
S. pombe Pmk1                  EVYIYEELMEADLNAAIKSGQPLTDAHFQSFIYQILCGLKYIHSANVIHR
                                **.* **.* **.*:***.*****:***:***

```

**Figure S3. Conserved sequences surrounding the N-lobe subdomains IV and V in several fungal CIP MAPKs.** MAPKs ClustalW analysis (<https://www.genome.jp/tools-bin/clustalw>) of sequences surrounding the N-lobe subdomains IV and V in of Pmk1 MAPKs in *S. pombe* and *S. japonicus*, and putative MAPKs from *Chaetothyriales* (Gen Pep: DV737\_g786 and DV736\_g4926), and *Ophiocordyceps camponoti* (Gen Pep: CP532\_1836). '\*': identical amino acid; ':': conserved substitution, '!': semi-conserved substitution.

# Pck1

|                     |                                                                                     |                   |
|---------------------|-------------------------------------------------------------------------------------|-------------------|
|                     |                                                                                     | HR1               |
| <i>S. japonicus</i> | MYSIEAADDVQKKIDREKSLIQGAKAMVDSTGNSEVKQRIEKKIREASSNIDYLTNRIN                         |                   |
| <i>S. pombe</i>     | MVQLD DALQDAYKKVEREESLILGAKAMVASTKNPEVKRRLESNIIVSNNIKYLRERID                        |                   |
|                     | * : : * : * : * : * : * : * : * : * : * : * : * : * : * : * : * : * : * : * : * : * |                   |
|                     | SLMIEKN---APSLRGIQKAFDEKSVSSSSMSKVVNGKSAFDILLKAPINEEIIIMTK                          |                   |
|                     | ALKVESGSEERESQSDKSSKKYSDSAKSTNSDDHLLSYNRSAFDLFNSKPLSPKEKISTM                        |                   |
|                     | : * : * : : * : : * : : : * : * : : : * : * : : * : * : * : * : * : * : *           |                   |
|                     | HR1                                                                                 |                   |
|                     | MKFTQMRLVVEEQCLAGVDKIVNLYSKESKNTEEAQAQREEILQKTRLLKSALKRYKELY                        |                   |
|                     | LQHLQMRLSIBQQCVSGIEKIMSLYSKEQKDKTDVTIKLKEGKQKVNLLKRSLSKRYNELH                       |                   |
|                     | : : : * : * : * : * : * : * : * : * : * : * : * : * : * : * : * : * : * : * : *     |                   |
|                     | C2                                                                                  |                   |
|                     | LPSDEPNSTASETS-----IAKNLFKPLTGTVKLTIHAIKNVHDHTDANEQSHGAHDTFLN                       |                   |
|                     | LPEDISTPSSEKQQAAGLNFRLGAKPISGTLKVTIHSLRNIEHTSFLQTHSFTMPSYAV                         |                   |
|                     | * * : : : * : * : * : * : * : * : * : * : * : * : * : * : * : * : * : * : * : *     |                   |
|                     | C2                                                                                  |                   |
|                     | IVVDNRVCKSRVTQHDWTNEAFVFEMNKARECEVVYDRKPKDSLPIALLWVPSALILD                          |                   |
|                     | LYVDDAQVAKSRISQTDTWDETFFDVHRAKEFQIIIEKKKDFDIPALILIPITTLIAE                          |                   |
|                     | : : * : * : * : * : * : * : * : * : * : * : * : * : * : * : * : * : * : * : *       |                   |
|                     | C2                                                                                  |                   |
|                     | DSRRKRNQLQELSEIDWKMNDSMLPLKHSSTRTN--ASVSTDVASNAGAAPPQGDTRKL                         |                   |
|                     | ELRRKRNIQEMSETSWKPSIAESASRSDEKSGKSDPINAPNSSSISTNSPLAFTAYYKL                         |                   |
|                     | : * : * : * : * : * : * : * : * : * : * : * : * : * : * : * : * : * : * : *         |                   |
|                     | Ps                                                                                  |                   |
|                     | LSQVWLSLEPAGQICVSLEFTKKVPNSKVISDNGLGRGQATROKKEVISDFLGHSPFLR                         |                   |
|                     | LSKSWLSLEPVGQICISLSFSKRTTKRQFP-ETELGRGQATROKKEQVVASQVGHQFVQR                        |                   |
|                     | * : * : * : * : * : * : * : * : * : * : * : * : * : * : * : * : * : * : *           |                   |
|                     | C1                                                                                  |                   |
|                     | QFYQIMRCVAVCADFLKDGSGQLCAECSTYCHRRCLMKTINRCIAKTHSVTAPPEGGESLK                       |                   |
|                     | QFYQIMRCVAVCAELFSYSPGLQCENCSFVCHKCKVTKVLASCIQNSSEKSDPGG---LR                        |                   |
|                     | * : * : * : * : * : * : * : * : * : * : * : * : * : * : * : * : * : * : *           |                   |
|                     | C1                                                                                  |                   |
|                     | HHIPHRFEFYNFSANWCSHCGYFISFLKDKCYKCKECGITCHIRCSRLIPDLGMSNDM                          |                   |
|                     | YRIPHRFEFYNFSIGAQWCAHCGFFFLRRLKDCFKCCEGITCHGQCAHLIPDYCGMSNDL                        |                   |
|                     | : * : * : * : * : * : * : * : * : * : * : * : * : * : * : * : * : * : *             |                   |
|                     | ANHILNEIRSTKLLTSRVMSAASVSKPAAPEIKSPTPFSFRKSGGVPSISQGLLFATQ                          |                   |
|                     | KHQLLELEVSKRPKK---PELPNQENKTTNEKVYRKPLSSQNTPTDPTLPTISQGLLAATQ                       |                   |
|                     | : : * : * : * : * : * : * : * : * : * : * : * : * : * : * : * : * : * : *           |                   |
|                     | QLAGSLPEAPPPRP-----AIPAHSPSPSIAETLLKPEVPDVKQCSSP-----SSIASK                         |                   |
|                     | PVTSVLNTSPLEKTPKDRSLNVTSPSSSTPTPASVLAPPSSASLSSSKDANRSVPESPRR                        |                   |
|                     | : : * : * : * : * : * : * : * : * : * : * : * : * : * : * : * : * : * : *           |                   |
|                     | KGKPRIGLDDPTFLAVLGKGNFGKVMIAEYKHNKRLYAIKVLKDSILKNNELKSEKSEK                         |                   |
|                     | EKKNRVTLDPTFLAVLGKGNFGKVMIAEYKVNKKFYAIKVLKKEAILKNEELKSEKTEK                         |                   |
|                     | : * : * : * : * : * : * : * : * : * : * : * : * : * : * : * : * : * : *             |                   |
|                     | RVFMTANKEKHPFLNLNLFASFQIGTRVYFVMEYIDGGDLMLHIQREQFSLKRAQFYAAEV                       |                   |
|                     | HVFEVANKEKHPFLNLNLFASFQIGTRVYFVMEYILGGDLMVHIQREQFSVKKARFYGAEV                       |                   |
|                     | : * : * : * : * : * : * : * : * : * : * : * : * : * : * : * : * : * : *             |                   |
|                     | Activation Loop                                                                     |                   |
|                     | CLGLKYFHENHIYRDLKLDNILLSDGHIKIADYGLCKENMTEGKFTSTFCGTPEFMAP                          |                   |
|                     | CLALKYFHENGIAIYRDLKLDNILLCPDGHIRIADYGLCKENMLLGNITSTFCGTPEFMAP                       |                   |
|                     | * : * : * : * : * : * : * : * : * : * : * : * : * : * : * : * : * : * : *           |                   |
|                     | EILLDQQYNRAVDWNAFQVLLYQMLLGQSPFKGDEDEEIFEAILNDEPMFPIHMPGEAVD                        |                   |
|                     | EILLEQQYSKVDWNAFQVLLYQMLLGQSPFKGDEDEEIPDAILNDEPLFPIHMPGEAVS                         |                   |
|                     | * : * : * : * : * : * : * : * : * : * : * : * : * : * : * : * : * : * : *           |                   |
|                     | IMQKLLTRDIDKRLGGGPRDALDVMEHPFFRGVDWDMIFKKQIEPTYKPRITGAYDINN                         |                   |
|                     | LLRGLLTRDPNORLGGGPKDANEVMAHPFFASIVWDDLYNKLYEPSYKPLINDPRLNNE                         |                   |
|                     | : : * : * : * : * : * : * : * : * : * : * : * : * : * : * : * : * : * : *           |                   |
|                     | Turn motif                                                                          | Hydrophobic motif |
|                     | DVEFTREPRVLTVPVNSILSKTEQESFRGFSSFAGSED                                              |                   |
|                     | DEEFTSACPTLTVPVNTVLTQQQECFRGFSSFATE--                                               |                   |
|                     | * * * * * : * : * : * : * : * : * : * : * : * : * : * : * : * : * : *               |                   |

**Figure S4. Conserved structural features of Pck1 orthologs in *S. pombe* and *S. japonicus*.** Conserved domain structure of Pck1 orthologs from *S. pombe* and *S. japonicus* obtained after protein sequence alignment by CLUSTALW (<https://www.genome.jp/tools-bin/clustalw>). '\*': identical amino acid; ':': conserved substitution, ':': semi-conserved substitution. Labels: HR1 (red), putative rho-binding repeat; C2 (yellow), putative Ca(2+)-binding motif; Ps (green), putative pseudosubstrate motif; C1 (blue), putative diacylglycerol binding motif. Amino acid sequence alignment of Pck1 and Pck2 is also shown. Conserved canonical phosphorylated residues at the activation loop (AL), turn motif (TM), and hydrophobic motif (HM) within the catalytic domain (gray) are marked in red.

## Pck2

HR1

|                     |          |                                                     |
|---------------------|----------|-----------------------------------------------------|
| <i>S. japonicus</i> | MTINDAI  | TEVERKIGRERSMTHGARAMEQLTRNQVHQQLRANIKAEARNIAYLEERIQ |
| <i>S. pombe</i>     | MDMIDEAI | TEVVVKIERERSVTHGALSMLRLTQNTVHQQLHSNTEESKKSITYLEERIE |

\* : \* : \* \* \* \* \* \* \* \* \* \* : \* : \* : \* : \* : \* : \* : \* : \* : \* : \*

KLRLRQAGVHSKSSSTSVSG---LSTGNGQDSEDKSKETNSQPPLTNLDIIKYDTPITIAK  
 KLKLRFNGVRKSNSEKPSVGIEKNPSFSTTKSAKSFSTSSNIDSNLDLNYDTPITISK  
 \* : \* : \* : \* : \* : \* : \* : \* : \* : \* : \* : \* : \* : \* : \* : \* : \* : \* : \*

HR1

ISVMIQQLEFKLTLEKQFREGIDRMALYQREGDKRSIFEAETKRVESAQRKILQQALM  
 ISFLQQLEFKLSVEEQYRKGIKMAKLYEREHRRSIAEAEGKYVESAQRITLLKQALM  
 \* : \* : \* : \* : \* : \* : \* : \* : \* : \* : \* : \* : \* : \* : \* : \* : \* : \* : \*

C2

RYHDLHIEIDDDLTNTGTQLIAPNIRRPQSGTLTICIGSLRNVNHSSTISITRTTETVAVI  
 RYHDLHIEIDEDVPSTESRGNLNARRPQSGLLKITVGSRLNVTHSAG-ISKQTEMIVAI  
 \* : \* : \* : \* : \* : \* : \* : \* : \* : \* : \* : \* : \* : \* : \* : \* : \* : \* : \*

C2

KIEDVERSTRPFRNDKFNFAFDIDVEKANEVEIVVYDKND-KTIPIALLWIRLSDLVE  
 RAEDLERARTPFRSRTDRFNETFEIDLEKTNEVEIVVYKNEKLLLPVGLLWIRLSDLVE  
 : \* : \* : \* : \* : \* : \* : \* : \* : \* : \* : \* : \* : \* : \* : \* : \* : \* : \*

QLRRKKEQEISDSGWVSADKMDTDFLSKSTGNRRSLLVPIKNETSHGSSSTTSVSPFV  
 KQRRKKEQEISDSGWVSADKMDTDFLSKSTGNRRSLLVPIKNETSHGSSSTTSVSPFV  
 : \* : \* : \* : \* : \* : \* : \* : \* : \* : \* : \* : \* : \* : \* : \* : \* : \* : \*

Ps

SAWFSMEPVGQIYLSLNFVKHNLKRPFDAELGRQGAIRARKITIEVFHGKFEVQQQFYQ  
 SAWFSLEPMGQINLTMTNFTKHNRKRPMDAGLGRQGAIRARKITIEVFHGKFEVQQQFYQ  
 \* : \* : \* : \* : \* : \* : \* : \* : \* : \* : \* : \* : \* : \* : \* : \* : \* : \* : \*

C1

IMRCALCGEFLKNAAGMOCIDCHYTKHKKCYPKVVKCISKPSDGTENEYEKINHRIPHH  
 IMRCALCGEFLKNAAGMOCIDCHYTKHKKCYPKVVKCISKPSDGTENEYEKINHRIPHH  
 \* : \* : \* : \* : \* : \* : \* : \* : \* : \* : \* : \* : \* : \* : \* : \* : \* : \* : \*

C1

FEAHTNIGANWCCHGYILPLGKVKARKCTECGVTAHVQCMHLPDFCGMSMEMANRILY  
 FESHTNIGANWCCHGYILPLGKVKARKCTECGVTAHVQCMHLPDFCGMSMEMANRILY  
 \* : \* : \* : \* : \* : \* : \* : \* : \* : \* : \* : \* : \* : \* : \* : \* : \* : \* : \*

ELRTTKPRKTPATRSASIPSTPVSKLTSKSEANHAKDSVSTTSLISPLAPTQSSPPP  
 EIRTTIYKAQQHKQKSSHHKHHHKKSSSSSKHKENDKASVITTTTPTSPADPVP  
 \* : \* : \* : \* : \* : \* : \* : \* : \* : \* : \* : \* : \* : \* : \* : \* : \* : \* : \*

VSTFVSVPVIEISSPPLTPAPSIKRPPIPGDNEQPLSPYSIPQAEATPKQDVTIVDS  
 TSPKPLAIEPVKRPVHAGNLEVTSVSDNKLGAIVQVVEQVDDKADALTKPPSLDAVKE  
 \* : \* : \* : \* : \* : \* : \* : \* : \* : \* : \* : \* : \* : \* : \* : \* : \* : \* : \*

VGRPVQATDANLAKTLVEPSKVVLDSFNFIISVLGKGNFGKVMLESKKTKNLFKVLK  
 PIPVPSVETSVAQDLTHKAKRIGLEDFTFLSVLKGKNGFKVMAELKSEKQLYAIKVLK  
 \* : \* : \* : \* : \* : \* : \* : \* : \* : \* : \* : \* : \* : \* : \* : \* : \* : \* : \*

KSFLENDEIESIKSEKRVFLVANREKHPFLNLHSCFQTETRIFFVMDYVSGGDLMLHI  
 KEFLENDEVESTKSEKRVFLVANREKHPFLNLHSCFQTETRIFFVMDYVSGGDLMLHI  
 \* : \* : \* : \* : \* : \* : \* : \* : \* : \* : \* : \* : \* : \* : \* : \* : \* : \* : \*

QQEQFYPRRAQFYAAEVCLALKYFHDNGIYRDLKLDNILLSPDGHKLADYGLCKENMW  
 QQEQFSRRRAQFYAAEVCLALKYFHDNGIYRDLKLDNILLSPDGHKLVADYGLCKEDMW  
 \* : \* : \* : \* : \* : \* : \* : \* : \* : \* : \* : \* : \* : \* : \* : \* : \* : \* : \*

Activation Loop

DKNTIVTCGTPEFMAPEILLEQKYTRAVDWWAFGLIYQMLLGQSPFRGDEEEIFDAI  
 HDNTATTCGTPEFMAPEILLEQKYTRAVDWWAFGLIYQMLLGQSPFRGDEEEIFDAI  
 \* : \* : \* : \* : \* : \* : \* : \* : \* : \* : \* : \* : \* : \* : \* : \* : \* : \* : \*

LTDEPLYPIHMPRDSVFILQQLTRAPEKRLGSGPNDVMAHFFFSNINWDDIYHKRI  
 LSDEPLYPIHMPRDSVFILQQLTRAPEKRLGSGPNDVMAHFFFSNINWDDIYHKRI  
 \* : \* : \* : \* : \* : \* : \* : \* : \* : \* : \* : \* : \* : \* : \* : \* : \* : \* : \*

Turn motif

QPPFVVKLEGGPKTKYFDEEFTSELPILTIQSTLSPERMHFEFGSYISDFDTPLGN--  
 QPPYIPSLNSPTDTKYFDEEFTRELPLTPVNSILTKEMQHFEGFSYSCEDDKPSTTDNA  
 \* : \* : \* : \* : \* : \* : \* : \* : \* : \* : \* : \* : \* : \* : \* : \* : \* : \* : \*

Hydrophobic motif

**Figure S5. Conserved structural features of Pck2 orthologs in *S. pombe* and *S. japonicus*.** Conserved domain structure of Pck2 orthologs from *S. pombe* and *S. japonicus* obtained after protein sequence alignment by CLUSTALW (<https://www.genome.jp/tools-bin/clustalw>). '\*': identical amino acid; ' ': conserved substitution, ' ': semi-conserved substitution. Labels: HR1 (red), putative rho-binding repeat; C2 (yellow), putative Ca(2+)-binding motif; Ps (green), putative pseudosubstrate motif; C1 (blue), putative diacylglycerol binding motif. Amino acid sequence alignment of Pck1 and Pck2 is also shown. Conserved canonical phosphorylated residues at the activation loop (AL), turn motif (TM), and hydrophobic motif (HM) within the catalytic domain (gray) are marked in red.

**Table S1. *S. japonicus* and *S. pombe* strains used in this work.**

| <b><i>S. japonicus</i> strains</b> | <b>Genotype</b>                                                                              | <b>Source</b>                    |
|------------------------------------|----------------------------------------------------------------------------------------------|----------------------------------|
| NIG2028                            | <i>h<sup>-</sup> prototroph</i>                                                              | Furuya & Niki 2009               |
| NIG5091                            | <i>h<sup>-</sup> ura4-D3</i>                                                                 | Furuya & Niki 2009               |
| EGJ4                               | <i>h<sup>-</sup> pmk1::ura4<sup>+</sup> ura4-D3</i>                                          | This work                        |
| EGJ108                             | <i>h<sup>+</sup> pck1::NatMX6</i>                                                            | This work                        |
| EGJ73                              | <i>h<sup>-</sup> pck2::ura4<sup>+</sup> ura4-D3</i>                                          | This work                        |
| EGJ128                             | <i>h<sup>+</sup> pck1::NatMX6 pmk1::ura4<sup>+</sup></i>                                     | This work                        |
| EGJ83                              | <i>h<sup>-</sup> pmk1::NatMX6 ura4-D3</i>                                                    | This work                        |
| PH6                                | <i>h<sup>-</sup> pmk1<sup>Sj</sup>-GFP::NatMX6</i>                                           | This work                        |
| EGJ140                             | <i>h<sup>-</sup> sty1::ura4<sup>+</sup> pmk1<sup>Sj</sup>-GFP::NatMX6</i>                    | This work                        |
| EGJ99                              | <i>h<sup>-</sup> pmk1<sup>Sj</sup>-HA::ura4<sup>+</sup> pmk1::NatMX6 ura4-D3</i>             | This work                        |
| EGJ132                             | <i>h<sup>-</sup> pmk1<sup>Sj</sup>(ins 82-105)-HA::ura4<sup>+</sup> pmk1::NatMX6 ura4-D3</i> | This work                        |
| EGJ96                              | <i>h<sup>-</sup> pmk1<sup>Sp</sup>-HA::ura4<sup>+</sup> pmk1::NatMX6 ura4-D3</i>             | This work                        |
| EGJ102                             | <i>h<sup>-</sup> pmk1<sup>Sp</sup>(Δ 82-105)-HA::ura4<sup>+</sup> pmk1::NatMX6 ura4-D3</i>   | This work                        |
| <b><i>S. pombe</i> strains</b>     | <b>Genotype</b>                                                                              | <b>Source</b>                    |
| MM1                                | <i>h<sup>+</sup></i>                                                                         | Lab stock                        |
| MI102                              | <i>h<sup>+</sup> pmk1::KanMX6</i>                                                            | Madrid <i>et al.</i> (2007)      |
| MM1904                             | <i>h<sup>-</sup> pmk1::NatMX6</i>                                                            | Madrid <i>et al.</i> (2017)      |
| BV829                              | <i>h<sup>-</sup> pck1::ura4<sup>+</sup></i>                                                  | Dr Takashi Toda                  |
| MM1197                             | <i>h<sup>+</sup> pck2::NatMX6</i>                                                            | This work                        |
| LS111                              | <i>h<sup>+</sup> pmk1<sup>Sp</sup>-GFP::leu1<sup>+</sup> pmk1::KanMX6</i>                    | Sánchez-Mir <i>et al.</i> (2012) |
| EG685                              | <i>h<sup>-</sup> pmk1<sup>Sj</sup>-HA::leu1<sup>+</sup> pmk1::NatMX6</i>                     | This work                        |
| EG686                              | <i>h<sup>-</sup> pmk1<sup>Sj</sup>(ins 82-105)-HA::leu1<sup>+</sup> pmk1::NatMX6</i>         | This work                        |
| EG682                              | <i>h<sup>-</sup> pmk1<sup>Sp</sup>-HA::leu1<sup>+</sup> pmk1::NatMX6</i>                     | This work                        |
| EG684                              | <i>h<sup>-</sup> pmk1<sup>Sp</sup>(Δ 82-105)-HA::leu1<sup>+</sup> pmk1::NatMX6</i>           | This work                        |

All *S. pombe* strains are *ade6-M216 leu1-32 ura4D-18*.

**Table S2. Oligonucleotides used in this work.**

| OLIGONUCLEOTIDE    | SEQUENCE 5'-3'                                                                                                               | Use                                                                                                           |
|--------------------|------------------------------------------------------------------------------------------------------------------------------|---------------------------------------------------------------------------------------------------------------|
| Pmk1Djp-W          | CCGCGTTTAATTACGATCATTACACC                                                                                                   | <i>pmk1</i> <sup>+</sup> deletion                                                                             |
| Pmk1Djp-X (Ura4)   | GAGCGGAAGAACGGAATCGTGGCGGCCGATGGTATTCCTTGCACT<br>CGAGAC                                                                      | <i>pmk1</i> <sup>+</sup> deletion ( <i>Ura4</i> <sup>+</sup> )                                                |
| Pmk1Djp-Y (Ura4)   | GCAGTGCGGTATCGTATAATTAGTGTCTAAGCAAGATACTGAAAGC<br>TGCC                                                                       | <i>pmk1</i> <sup>+</sup> deletion ( <i>Ura4</i> <sup>+</sup> )                                                |
| Pmk1Djp-X (NatR)   | GGGGATCCGTCGACCTGCAGCGTACGAGATGGTATTCCTTGCACT<br>TCGAGAC                                                                     | <i>pmk1</i> <sup>+</sup> deletion ( <i>NatR</i> )                                                             |
| Pmk1Djp-Y (NatR)   | GTTTAAACGAGCTCGAATTCATCGATCTAAGCAAGATACTGAAAG<br>CTGGC                                                                       | <i>pmk1</i> <sup>+</sup> deletion ( <i>NatR</i> )                                                             |
| Pmk1Djp-Z          | ACTACCACTTCTCACTACATTCTG                                                                                                     | <i>pmk1</i> <sup>+</sup> deletion                                                                             |
| Pmk1Djp-Comp2-5'   | CGCGTTCACCTCACATTTCTTCGTG                                                                                                    | Confirmation of <i>pmk1</i> <sup>+</sup> deletion.                                                            |
| Pck1Djp-W          | CACGCAGTTCTGTGTATTCCGGTTTT                                                                                                   | <i>pck1</i> <sup>+</sup> deletion                                                                             |
| Pck1Djp-X (NatR)   | GCGCGCCTTAATTAACCCGGGGATCCGTCGCGCGACTAAATTTAGC<br>AATGCTTAG                                                                  | <i>pck1</i> <sup>+</sup> deletion ( <i>NatR</i> )                                                             |
| Pck1Djp-Y (NatR)   | CCATCCAGTTTAAACGAGCTCGAATTCATCGTGTTCCTCGTGCGCG<br>CTTACGAACA                                                                 | <i>pck1</i> <sup>+</sup> deletion ( <i>NatR</i> )                                                             |
| Pck1Djp-Z          | AGCAGCGAATTAAGCGTCAATTCC                                                                                                     | <i>pck1</i> <sup>+</sup> deletion                                                                             |
| Pck1Djp-Comp-5'    | TTCTTCAACTGGAGGATTCTGTAAC                                                                                                    | Confirmation of <i>pck1</i> <sup>+</sup> deletion.                                                            |
| NatR-Comp-R        | TTATTGTCAGTACTGATTAGGGGCA                                                                                                    | Confirmation of <i>NatR</i> deletions.                                                                        |
| Pck2Djp-W          | CTTCGTATGCTCCATTCTTGATTGT                                                                                                    | <i>pck2</i> <sup>+</sup> deletion                                                                             |
| Pck2Djp-X (Ura4)   | GAGCGGAAGAACGGAATCGTGGCGGCCTTCTTTAAGGGAAACCGT<br>GAGGTAC                                                                     | <i>pck2</i> <sup>+</sup> deletion ( <i>Ura4</i> <sup>+</sup> )                                                |
| Pck2Djp-Y (Ura4)   | GCAGTGCGGTATCGTATAATTAGTGTCTCATTAAAGCATTTCACGG<br>CGATC                                                                      | <i>pck2</i> <sup>+</sup> deletion ( <i>Ura4</i> <sup>+</sup> )                                                |
| Pck2Djp-Z          | GTTCTACGGTCTTGATCTGCTGAAC                                                                                                    | <i>pck2</i> <sup>+</sup> deletion                                                                             |
| Pck2Djp-Comp-5'    | TTCTTCAACTGGAGGATTCTGTAAC                                                                                                    | Confirmation of <i>pck2</i> <sup>+</sup> deletion.                                                            |
| Ura4Sj-Comp-R      | CTTCTTGGCGACTGCATTAGGATGC                                                                                                    | Confirmation of <i>Ura4</i> <sup>+</sup> deletion.                                                            |
| Pmk1Sj:GFP-SalI-5' | ATAATGTGCGACGTATGGCAACCATGTGGTAGAC                                                                                           | <i>pmk1</i> <sup>+</sup> C-terminal tagging                                                                   |
| Pmk1Sj:GFP-PacI-3' | ATAATGTTAATTAAGTACTTGGACAGTTCTGCCTC                                                                                          | <i>pmk1</i> <sup>+</sup> C-terminal tagging                                                                   |
| GFP-Comp-5'        | CTGCCCTTTCCAAAGATCCCAACG                                                                                                     | Confirmation of C-terminal tagging                                                                            |
| Sty1Djp-W          | GCATGGGCGCGTTCGGTCTTGATG                                                                                                     | <i>sty1</i> <sup>+</sup> deletion                                                                             |
| Sty1Djp-X (URA4)   | GAGCGGAAGAACGGAATCGTGGCGGCCACACCAGCACTGTGGACGT<br>ACTTC                                                                      | <i>sty1</i> <sup>+</sup> deletion ( <i>Ura4</i> <sup>+</sup> )                                                |
| Sty1Djp-Y (URA4)   | GCAGTGCGGTATCGTATAATTAGTGTGACGATCTGCAGCAAGAATAC<br>ATTG                                                                      | <i>sty1</i> <sup>+</sup> deletion ( <i>Ura4</i> <sup>+</sup> )                                                |
| Sty1Djp-Z          | TGCTTGACCTCACTATCCACATTATG                                                                                                   | <i>sty1</i> <sup>+</sup> deletion                                                                             |
| Sty1jp-COMP5'      | ATGGCTGAATTTGTTTCGTACACAGAT                                                                                                  | Confirmation of <i>sty1</i> <sup>+</sup> deletion.                                                            |
| PromPmk1Jp-NoII-5' | ACTTAGCGGCCGCCGCGTTTAATTACGATCATTACACC                                                                                       | <i>pmk1</i> <sup>+</sup> <sup>Sj</sup> ORF Cloning and C-terminal tagging                                     |
| Pmk1Jp:HA-BamHI-3' | ACTTAGGATCCTTAGCCCGCATAGTCAGGAACATCGTATGGGTAGC<br>CGTACTTGACAGTTCTGCCTCGAGATC                                                | <i>pmk1</i> <sup>+</sup> <sup>Sj</sup> ORF Cloning and C-terminal tagging                                     |
| Pmk1Jp-Exon-5'     | ACTTGCAATTTACGATCTCGACATTATAAATCCATACAATTTTAATGAA<br>GTTTACATTTACGAAGAGATGGAAGCAGATTTAAATGCCATT                              | <i>pmk1</i> <sup>+</sup> <sup>Sj</sup> ORF Cloning and <i>pmk1</i> <sup>+</sup> <sup>Sp</sup> Exon2 insertion |
| Pmk1Jp-Exon-3'     | AATGTCGAGATCGTAAATGCAAGTAATTCCTGTGATTCCGAAGAT<br>GAATC                                                                       | <i>pmk1</i> <sup>+</sup> <sup>Sj</sup> ORF Cloning and <i>pmk1</i> <sup>+</sup> <sup>Sp</sup> Exon2 insertion |
| PromPmk1Sp-XbaI-5' | ACTTATCTAGATTTCTCATTGCCGCTTCTG                                                                                               | <i>pmk1</i> <sup>+</sup> <sup>Sp</sup> ORF Cloning and C-terminal tagging                                     |
| Pmk1Sp-HA-SmaI-3'  | CCTTACCCGGGTAGTGGTGATGATGGTGATGTGCATAGTCCGG<br>GACGTCATAGGGATAGCCCGCATAGTCAGGAACATCGTATGGGT<br>AGGATCCGTTATGGCGATTATCATCAGAC | <i>pmk1</i> <sup>+</sup> <sup>Sp</sup> ORF Cloning and C-terminal tagging                                     |
| Pmk1Sp-Δ Exon-5'   | CATTTTCGTAATCATCGTAACATGGAGGCCGATTGAATG                                                                                      | <i>pmk1</i> <sup>+</sup> <sup>Sp</sup> ORF Cloning and Exon2 deletion.                                        |
| Pmk1Sp-Δ Exon-3'   | CATTCAAATCGGCCTCCATGTTACGATGATTACGAAATG                                                                                      | <i>pmk1</i> <sup>+</sup> <sup>Sp</sup> ORF Cloning and Exon2 deletion.                                        |
| Pck2-Del-F         | CACATTAATATTAATAAACGGAAGCGAAAAATTGCAGATAAGAAGTTA<br>AGCGGAAAAATCAGGATTAGGCCATTTAAAGTACGGATCCCCGGG<br>TTAATTAA                | <i>pck2</i> <sup>+</sup> deletion ( <i>NatR</i> )                                                             |
| Pck2-Del-R         | AAAAAGTCGAAATTAGAATAATTTATCAATGCAATGAAAGATTAAGA<br>AAATGAGAGTAACTTTATGCTCAATTTAAGGTGGAATTCGAGCTCG<br>TTTAAAC                 | <i>pck2</i> <sup>+</sup> deletion ( <i>NatR</i> )                                                             |
